# Supplementary material
Source: ML conference proceedings conference paper supplement (https://openreview.net/forum?id=DJa8rxF67Y)
Supplement: supplementary_material [file attachment]

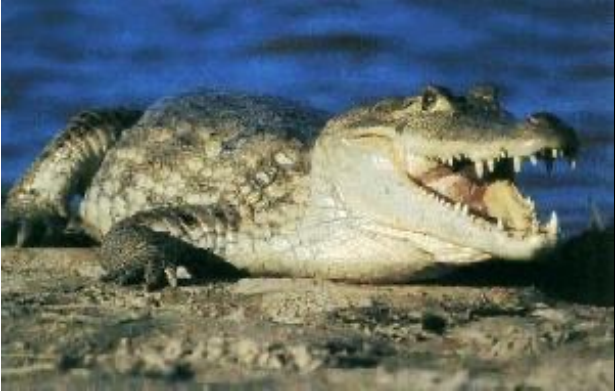

|       | Prompt #1                                                                                                    | Prompt #2                                                          | Prompt #3                                                          |
|-------|--------------------------------------------------------------------------------------------------------------|--------------------------------------------------------------------|--------------------------------------------------------------------|
| Top-1 | The crocodile stands on the edge of a body of water, which has links to the landmass that it is standing on. | Its skin is rough and scaly, with a dark brown color.              | The alligator has its mouth open and its teeth visible.            |
| Top-2 | The background is a body of water.                                                                           | The crocodile's body is long and slender, with a broad, flat tail. | The crocodile's body is long and slender, with a broad, flat tail. |

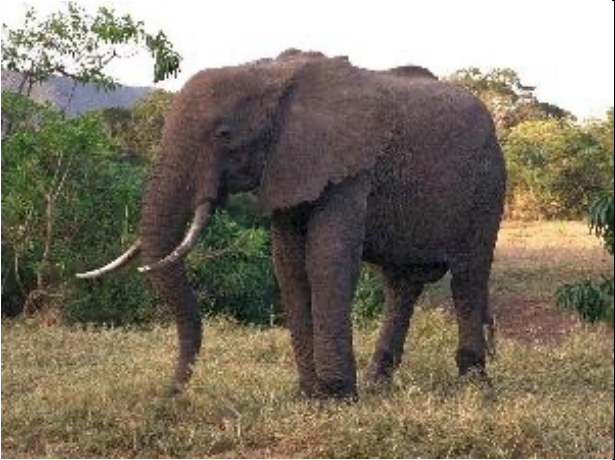

|       | Prompt #1                                                                     | Prompt #2                                                                                                  | Prompt #3                                                                                  |
|-------|-------------------------------------------------------------------------------|------------------------------------------------------------------------------------------------------------|--------------------------------------------------------------------------------------------|
| Top-1 | The elephant's body is large and muscular, with a thick trunk and large ears. | Its skin is rough and The elephant has large tusks and appears to be looking at something in the distance. | The trees in the background are tall and leafy, with branches reaching up towards the sky. |
| Top-2 | The elephant is standing on its hind legs, with its front legs on the ground. | The elephant's body is large and muscular, with a thick trunk and large ears.                              | The elephant's skin appears to be brown and rough, with a few patches of dirt on its body. |
