# Supplementary material
Source: ML conference proceedings conference paper supplement (https://openreview.net/forum?id=DJa8rxF67Y)
Supplement: supplementary_material [file attachment]

A dog that  
chews bones.

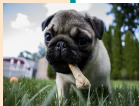

Puppies are good  
friends of people.

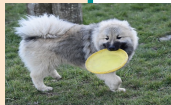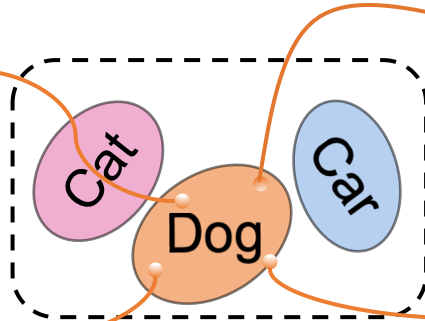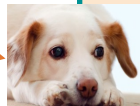

A picture of a  
dog.

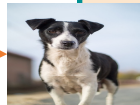

A pooch with  
black and white.
