# Supplementary material
Source: ML conference proceedings conference paper supplement (https://openreview.net/forum?id=DJa8rxF67Y)

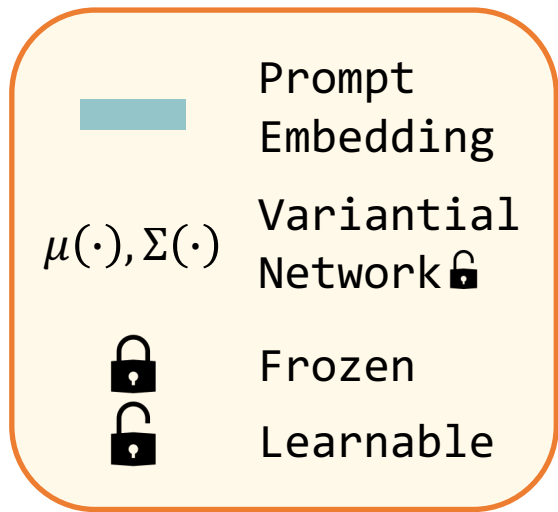

# Stochastic Prompts

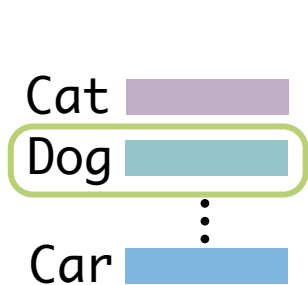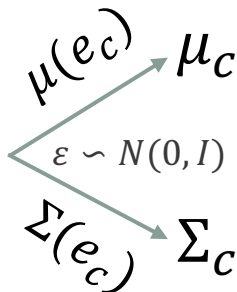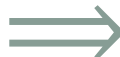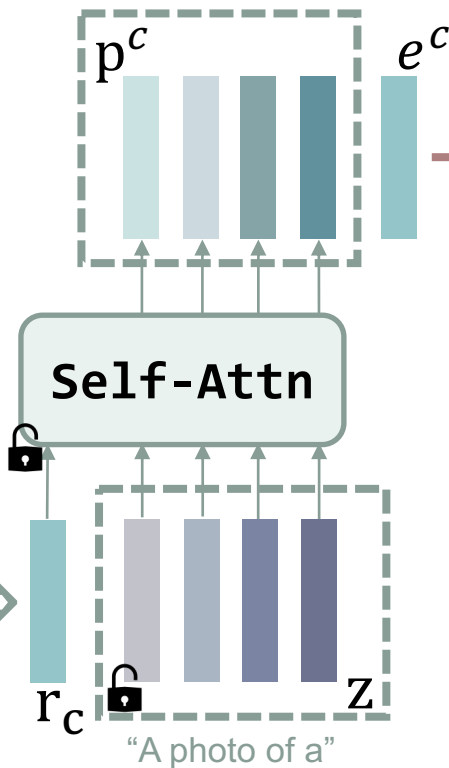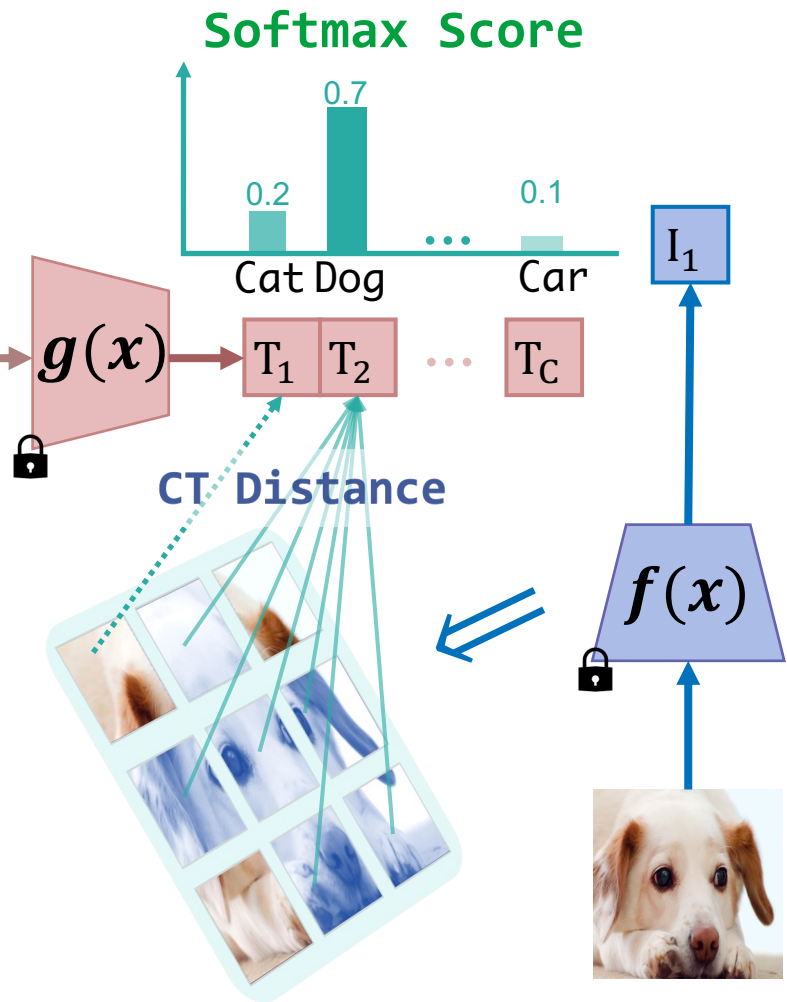

Supplement: supplementary_material [file attachment]

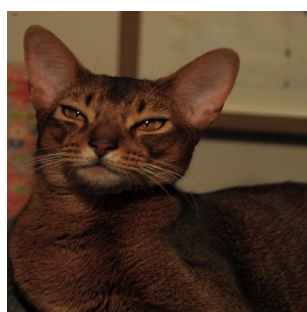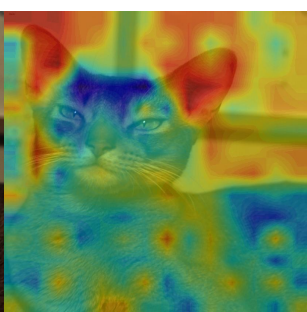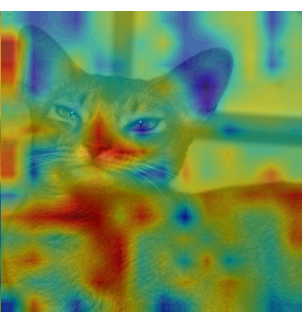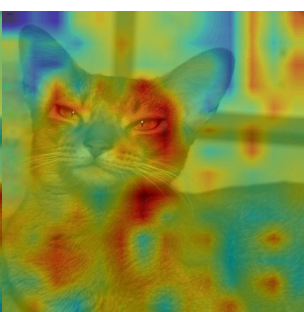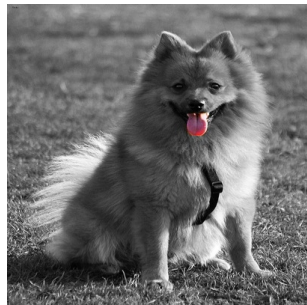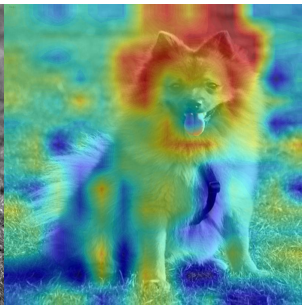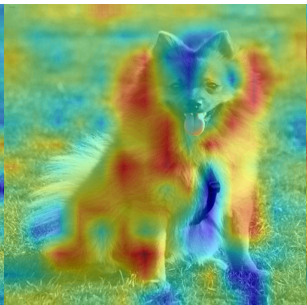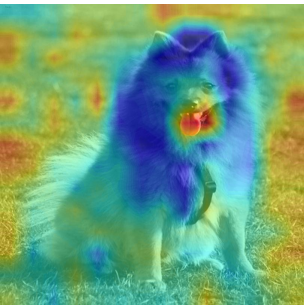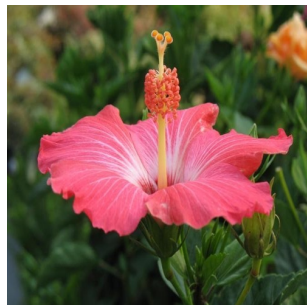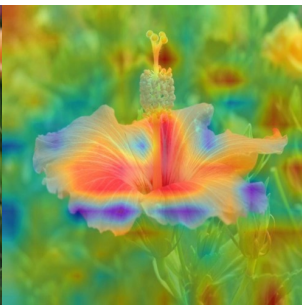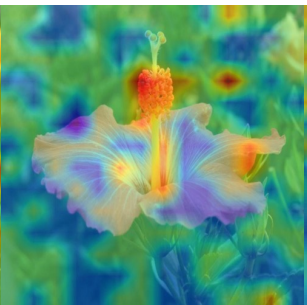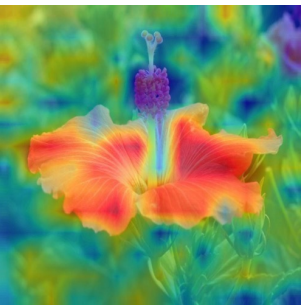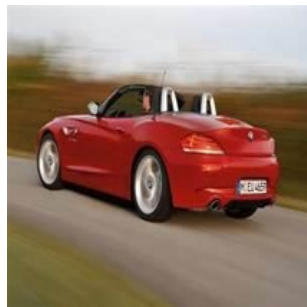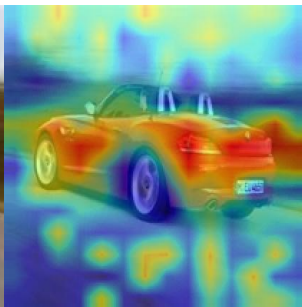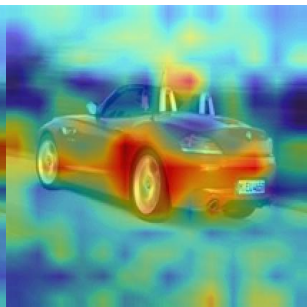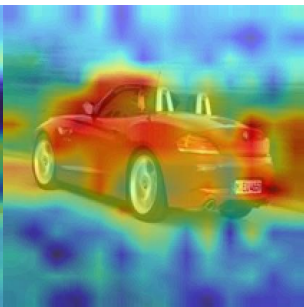

Supplement: supplementary_material [file attachment]

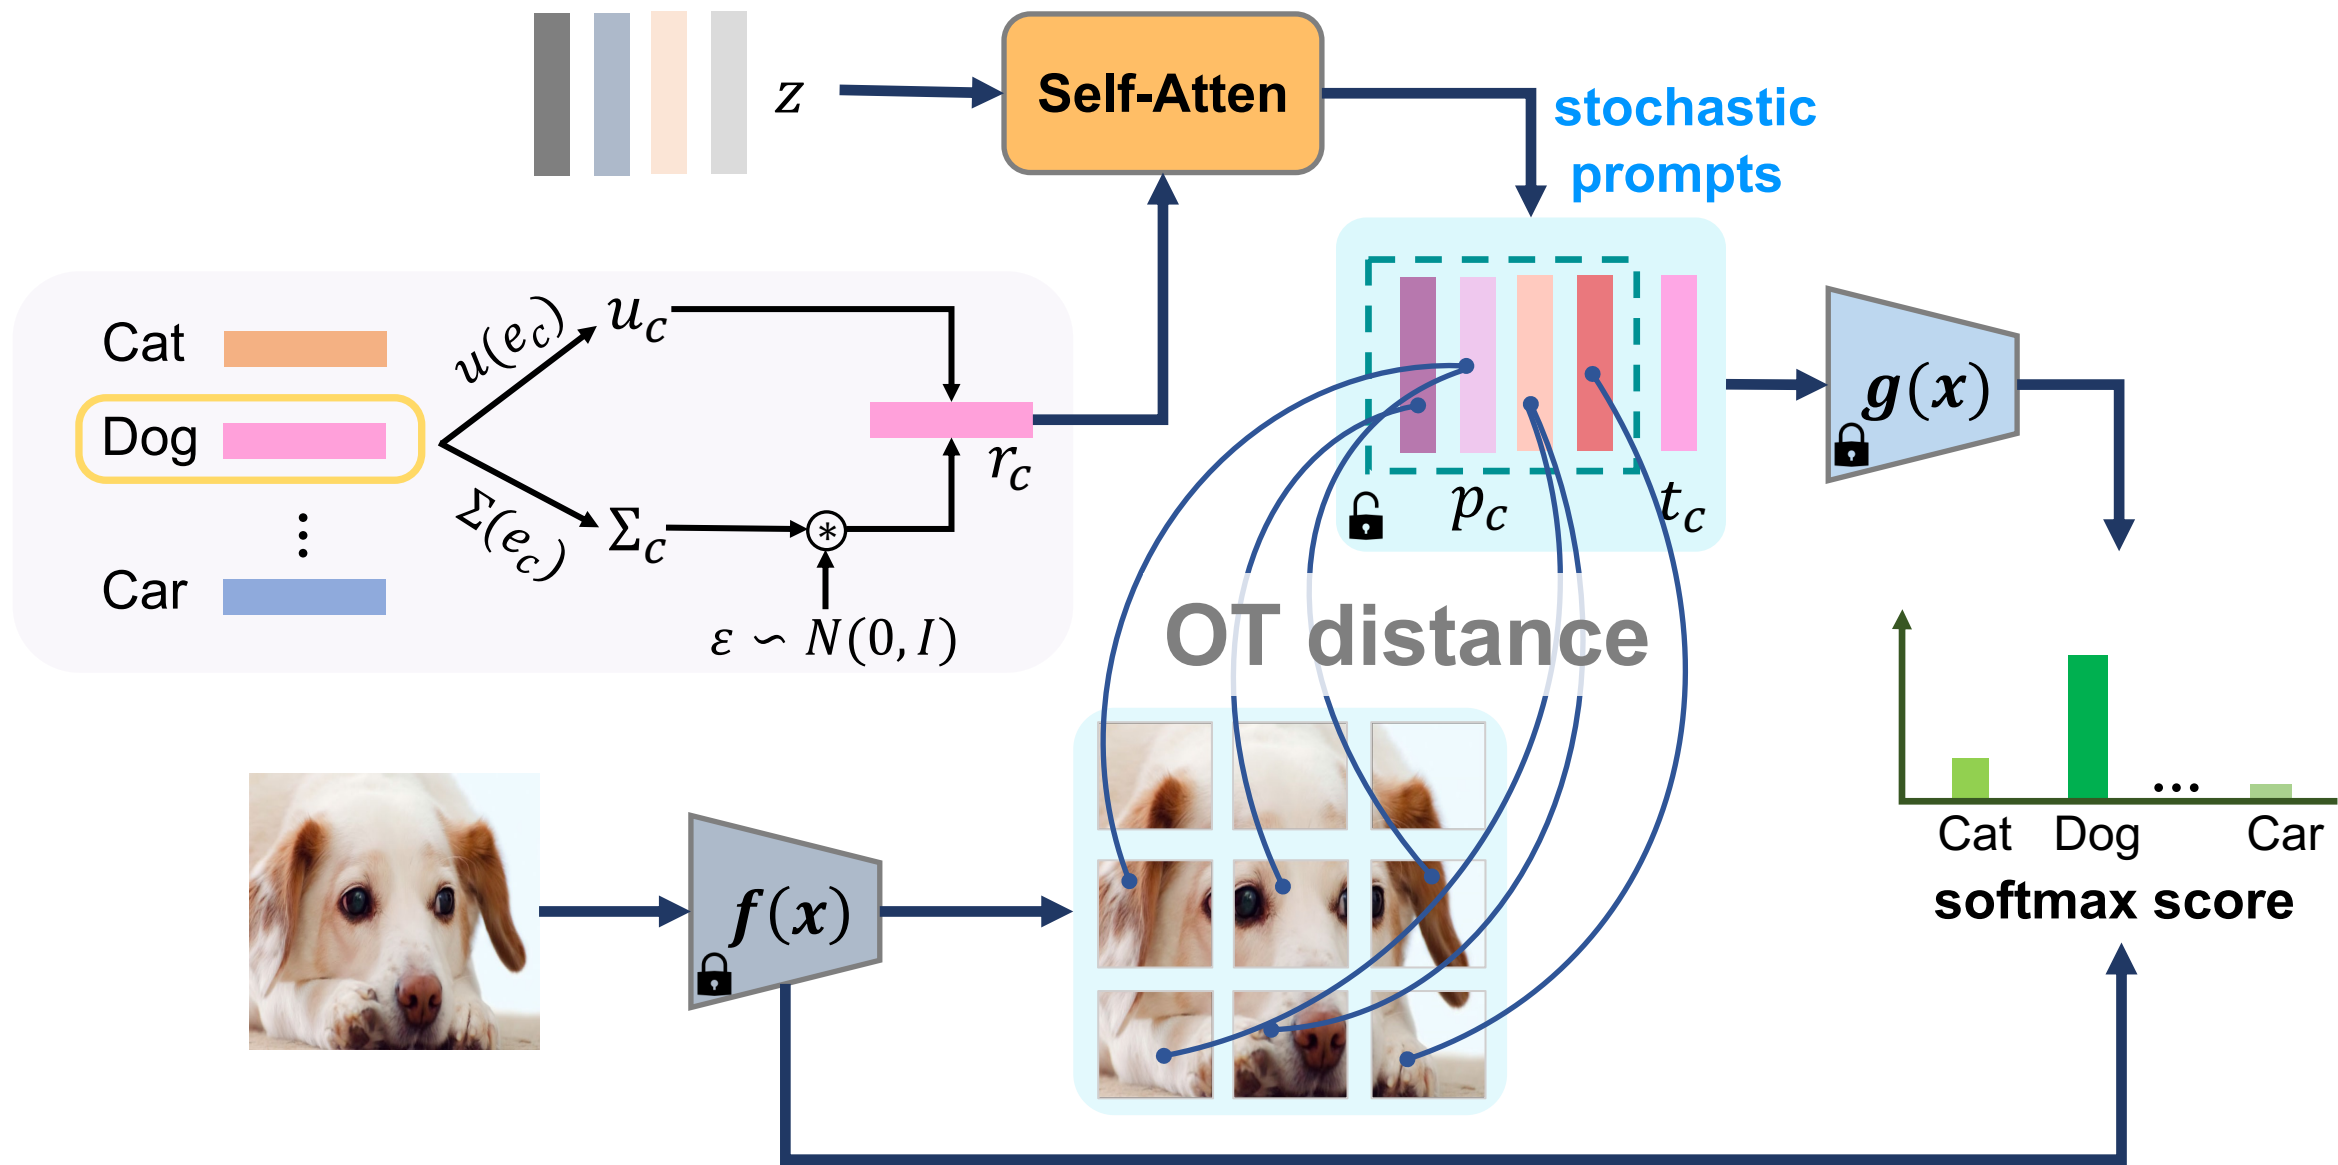

Supplement: supplementary_material [file attachment]

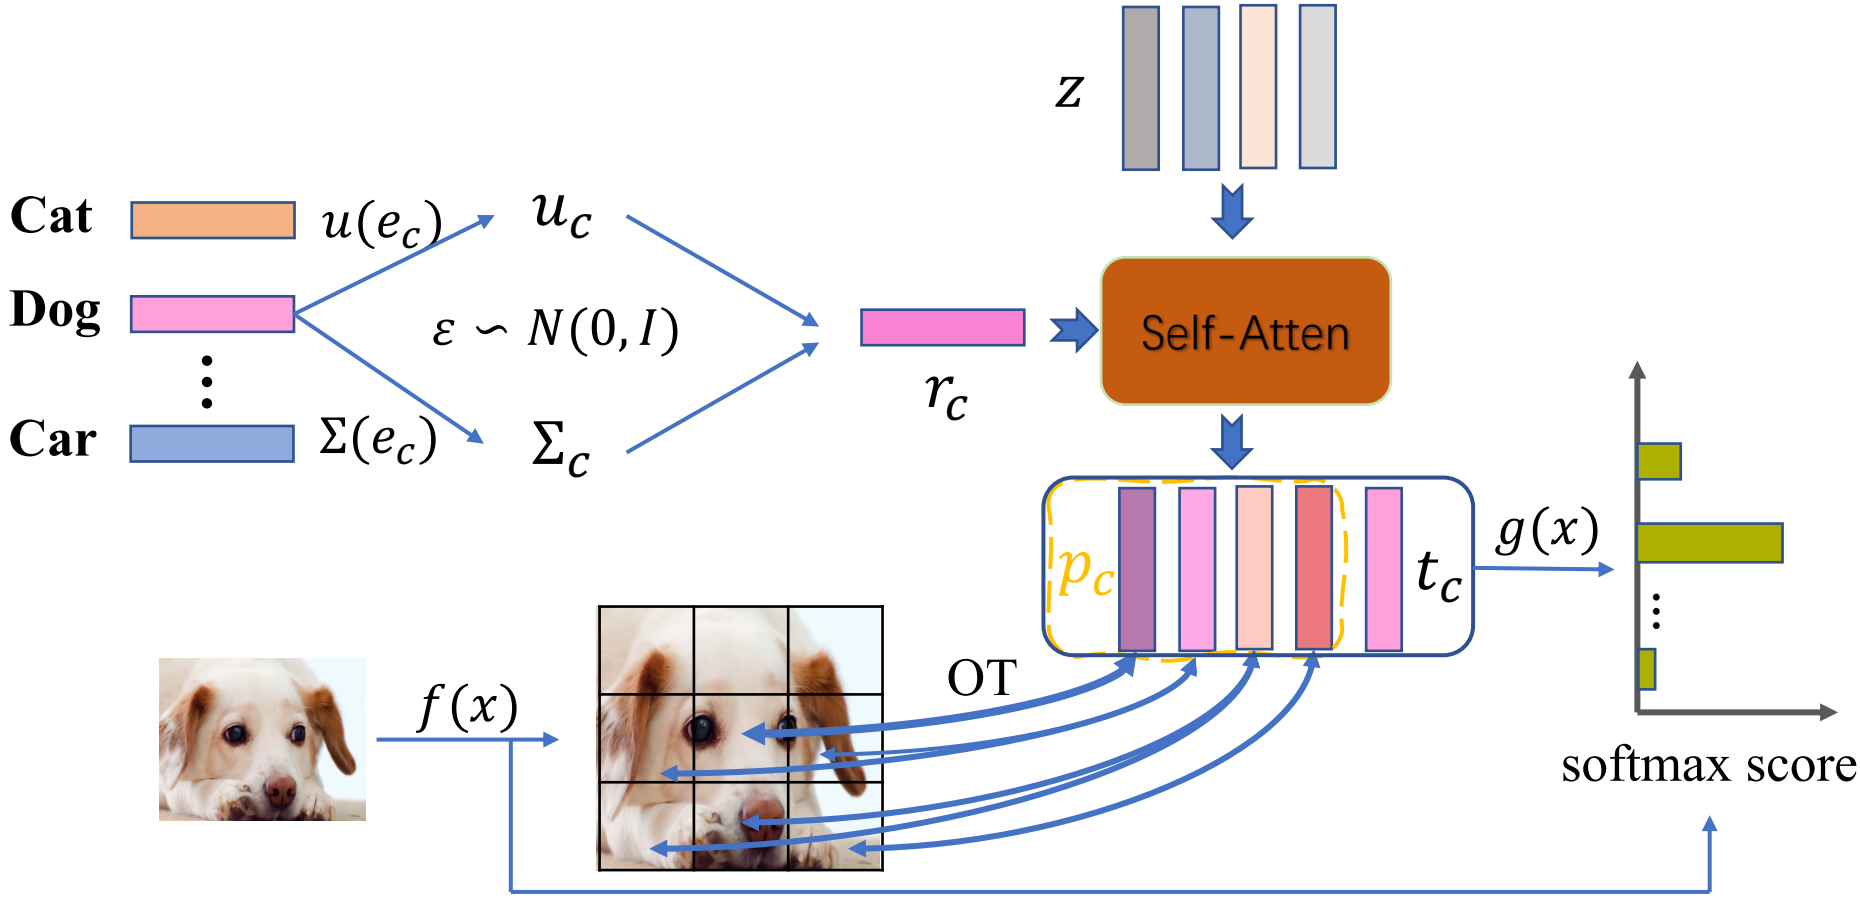

Supplement: supplementary_material [file attachment]

# Stochastic Prompts

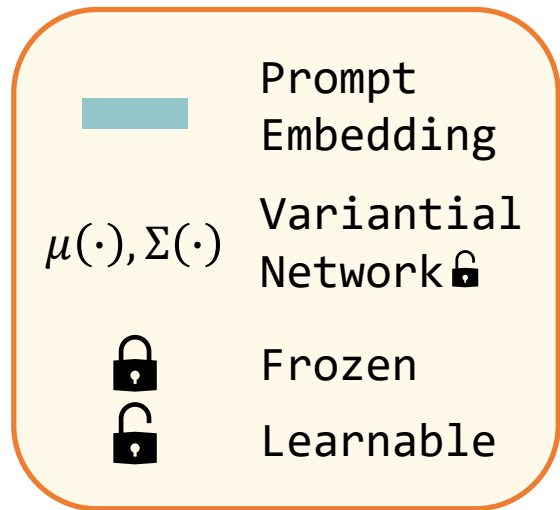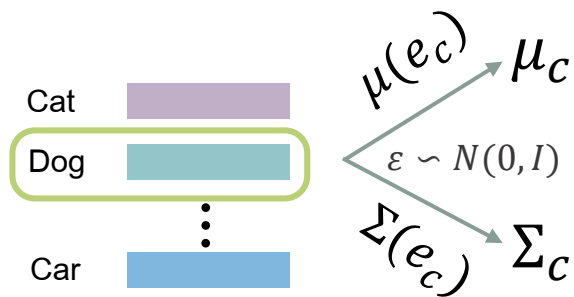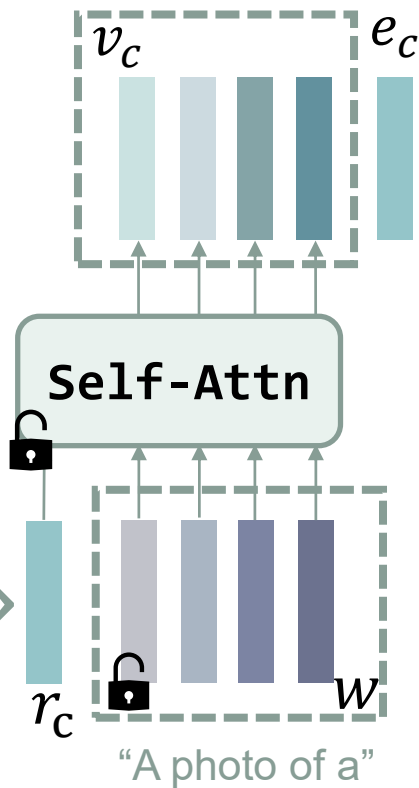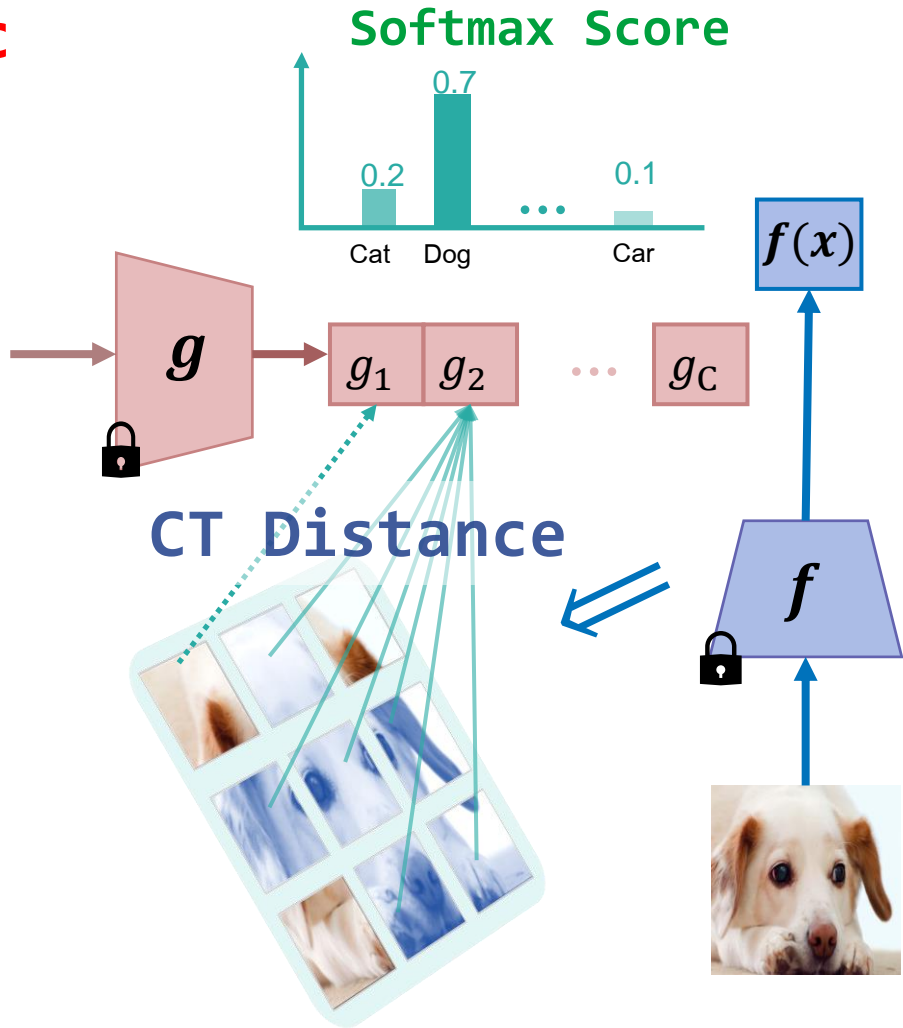

Supplement: supplementary_material [file attachment]

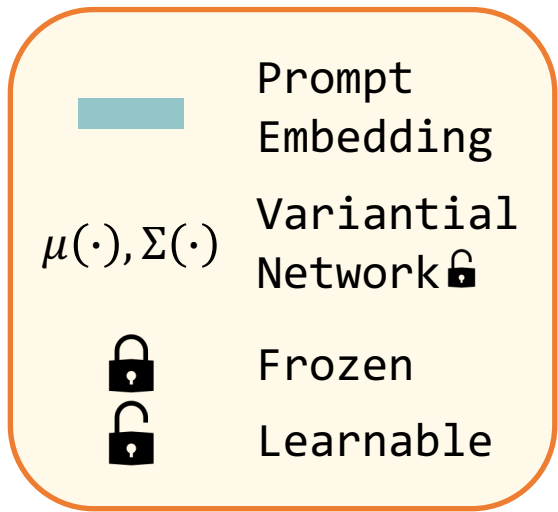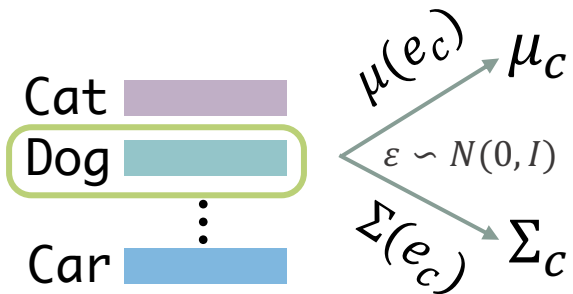

# Stochastic Prompts

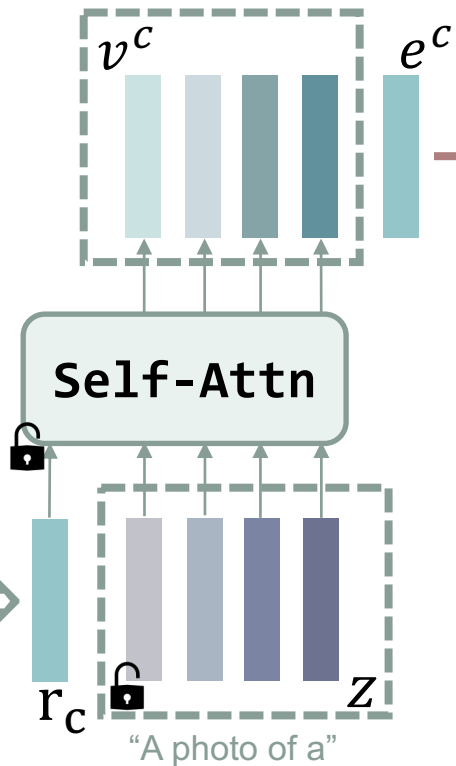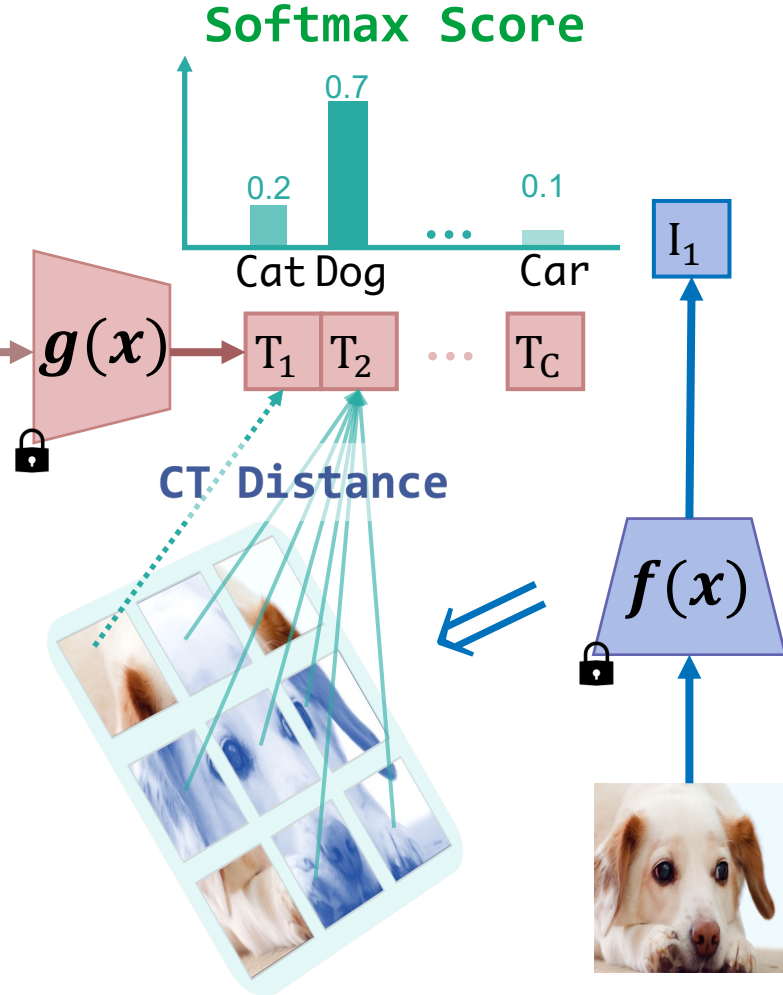

Supplement: supplementary_material [file attachment]

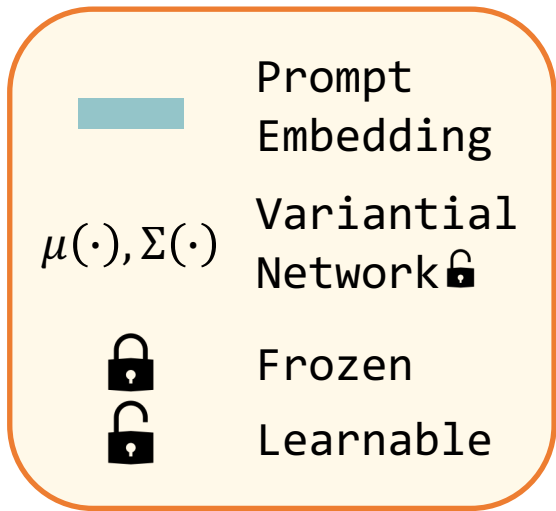

# Stochastic Prompts

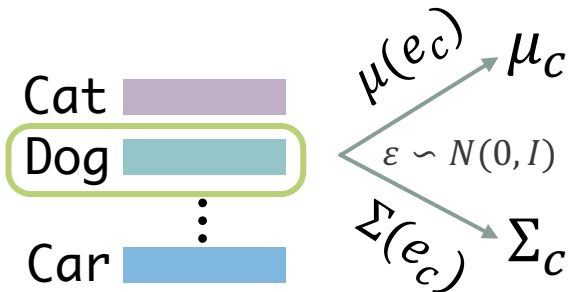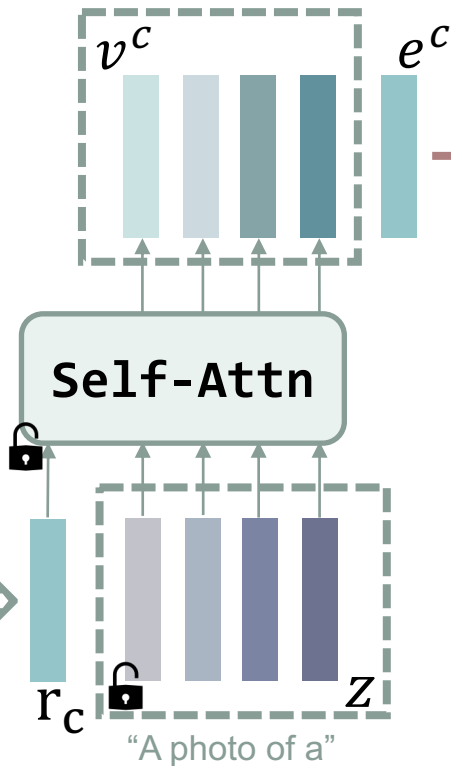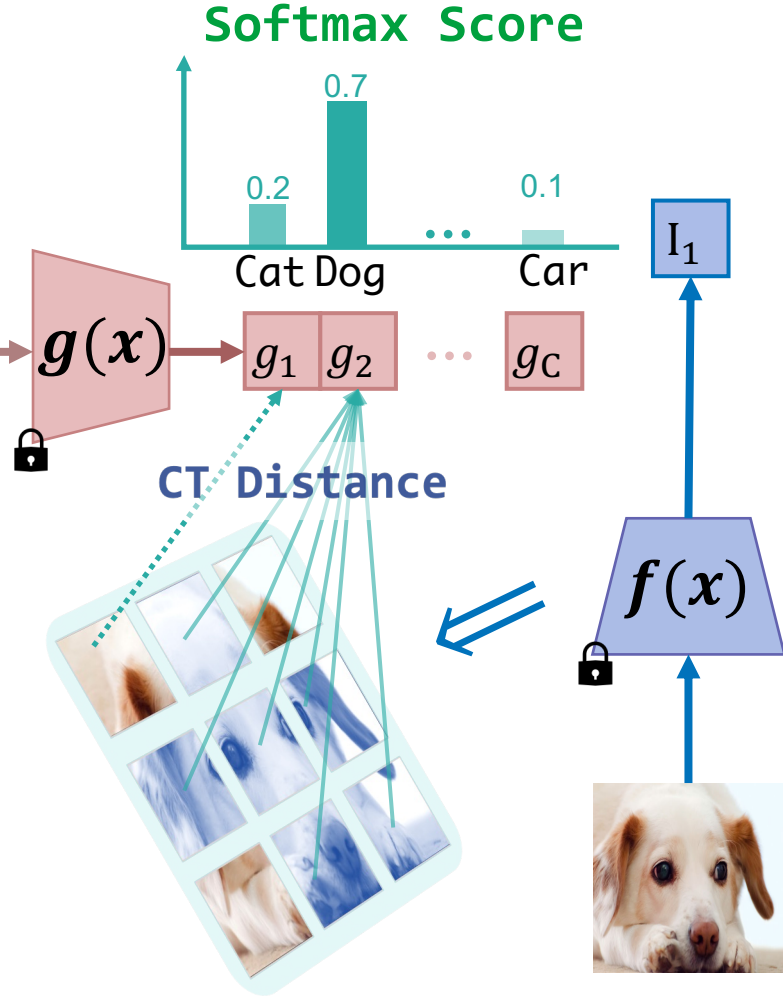

Supplement: supplementary_material [file attachment]

A dog that  
chews bones

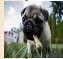

Dogs are good  
friends of humans

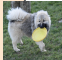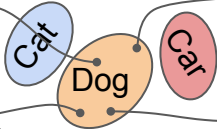

A picture of  
a dog.

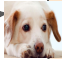

A dog with  
black and white

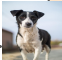

Supplement: supplementary_material [file attachment]

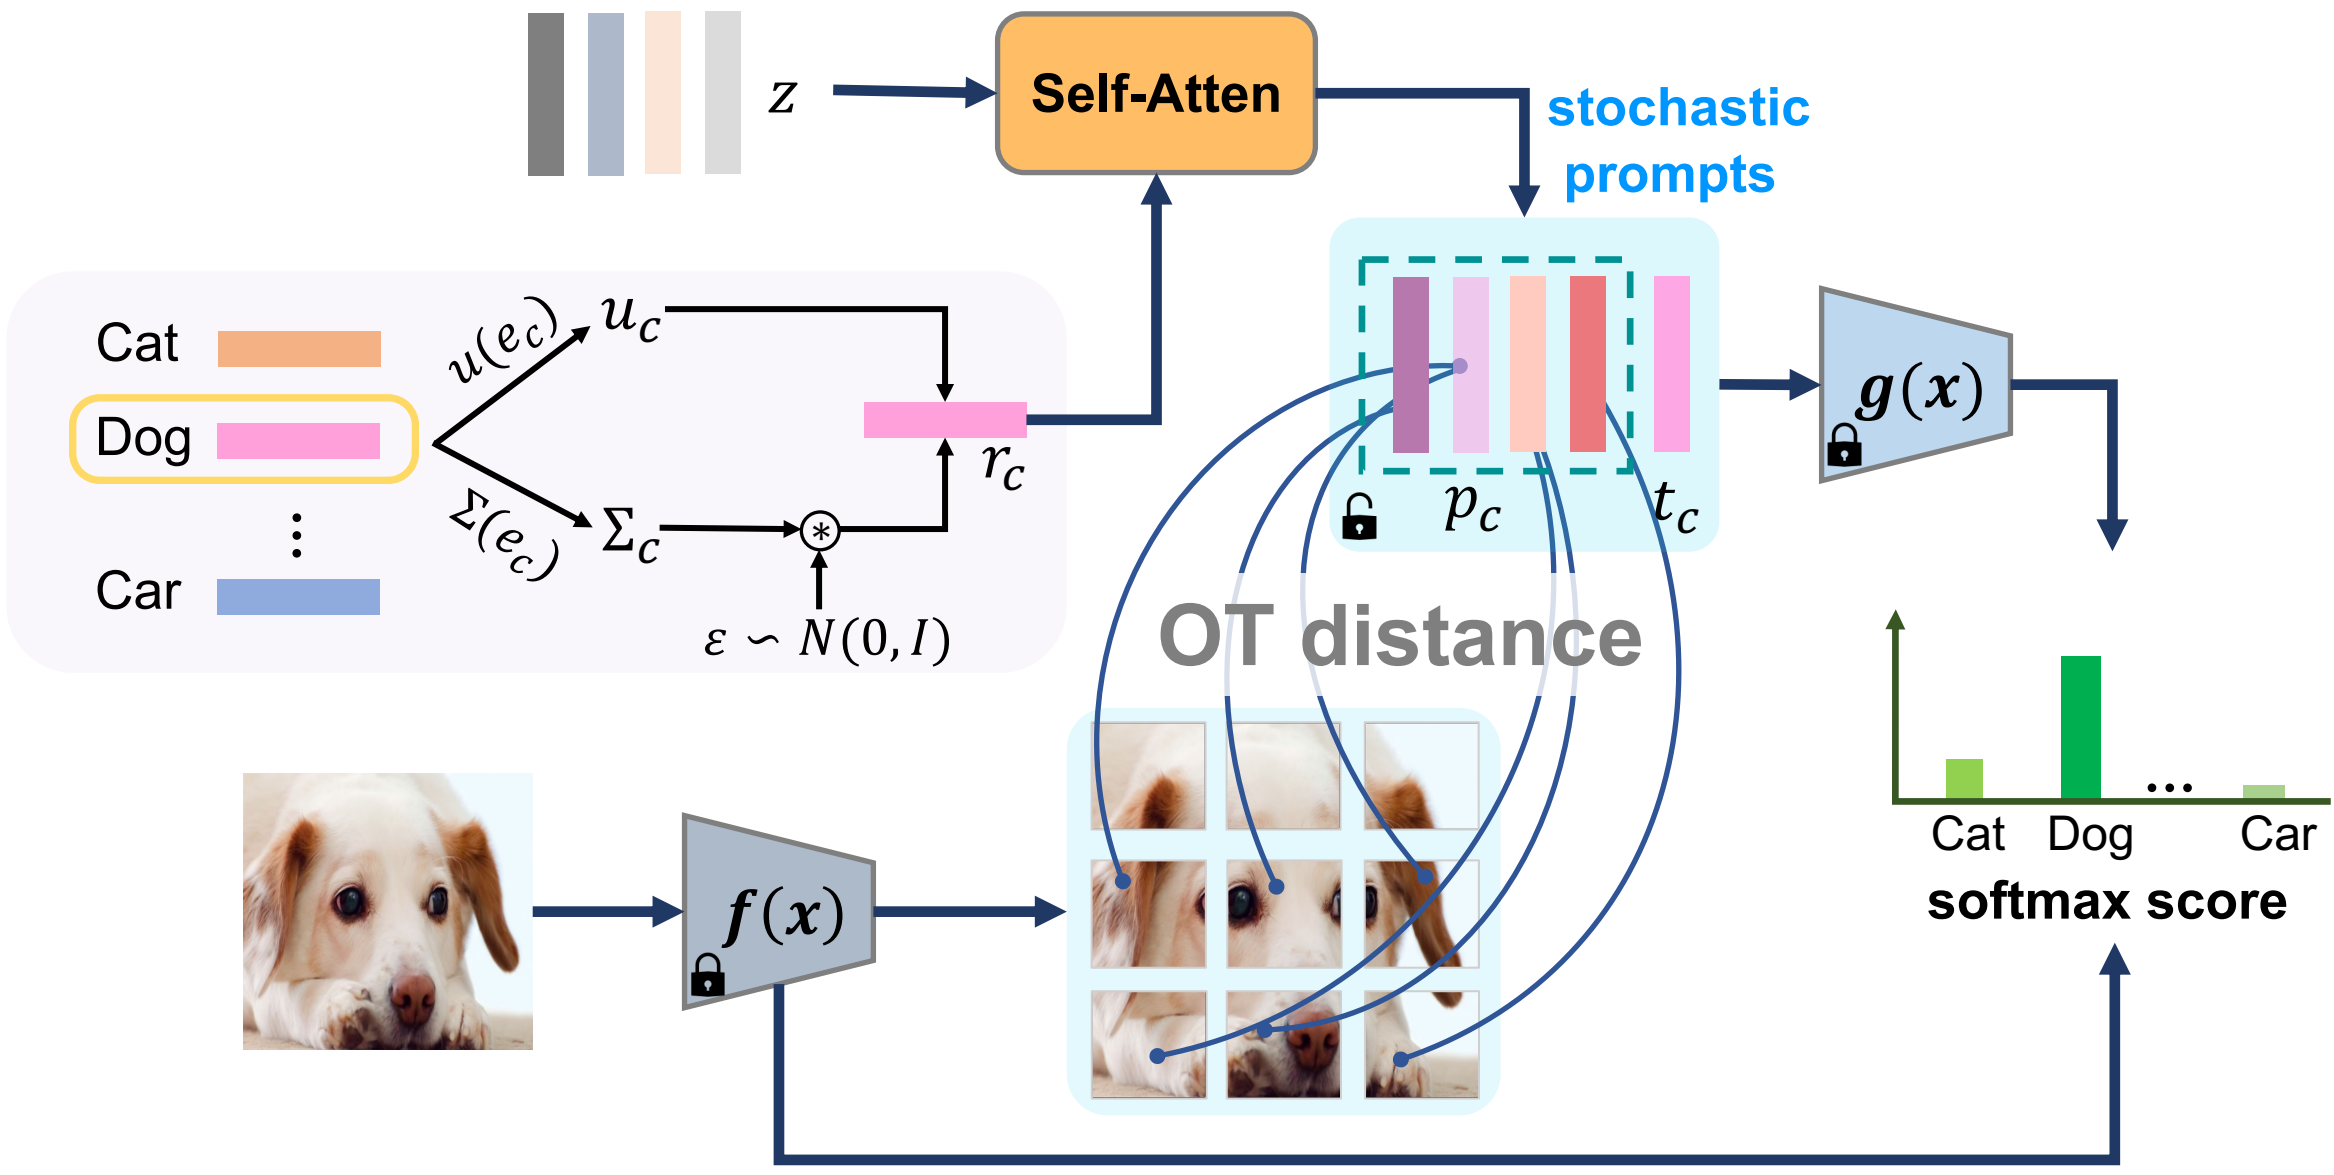

Supplement: supplementary_material [file attachment]

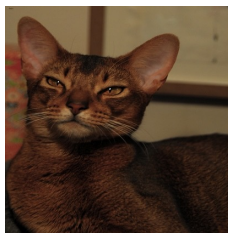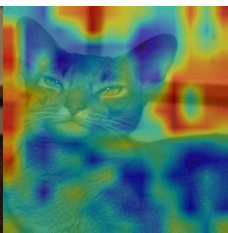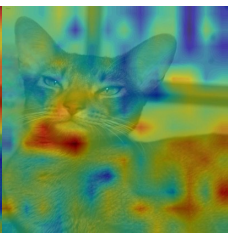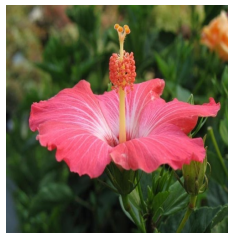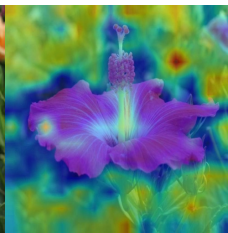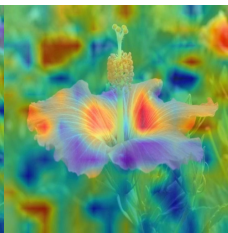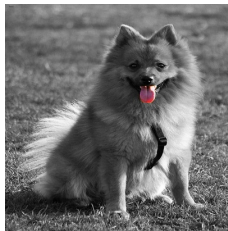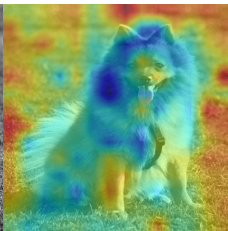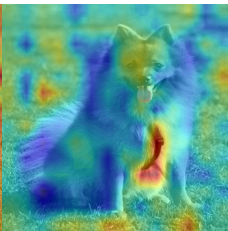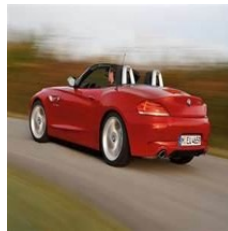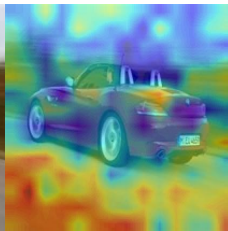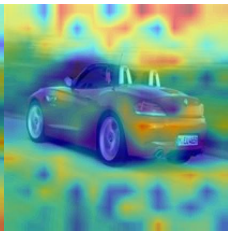

Supplement: supplementary_material [file attachment]
